# Supplementary material for: The SynMall resource for characterizing the functional impact of synonymous variation
Source: HighWire-hosted journal article supplement (doi:10.1101/gr.281257.125), 2025-12-17
Supplement: Supplemental_Fig_S2.pdf [file Supplemental_Fig_S2.pdf]

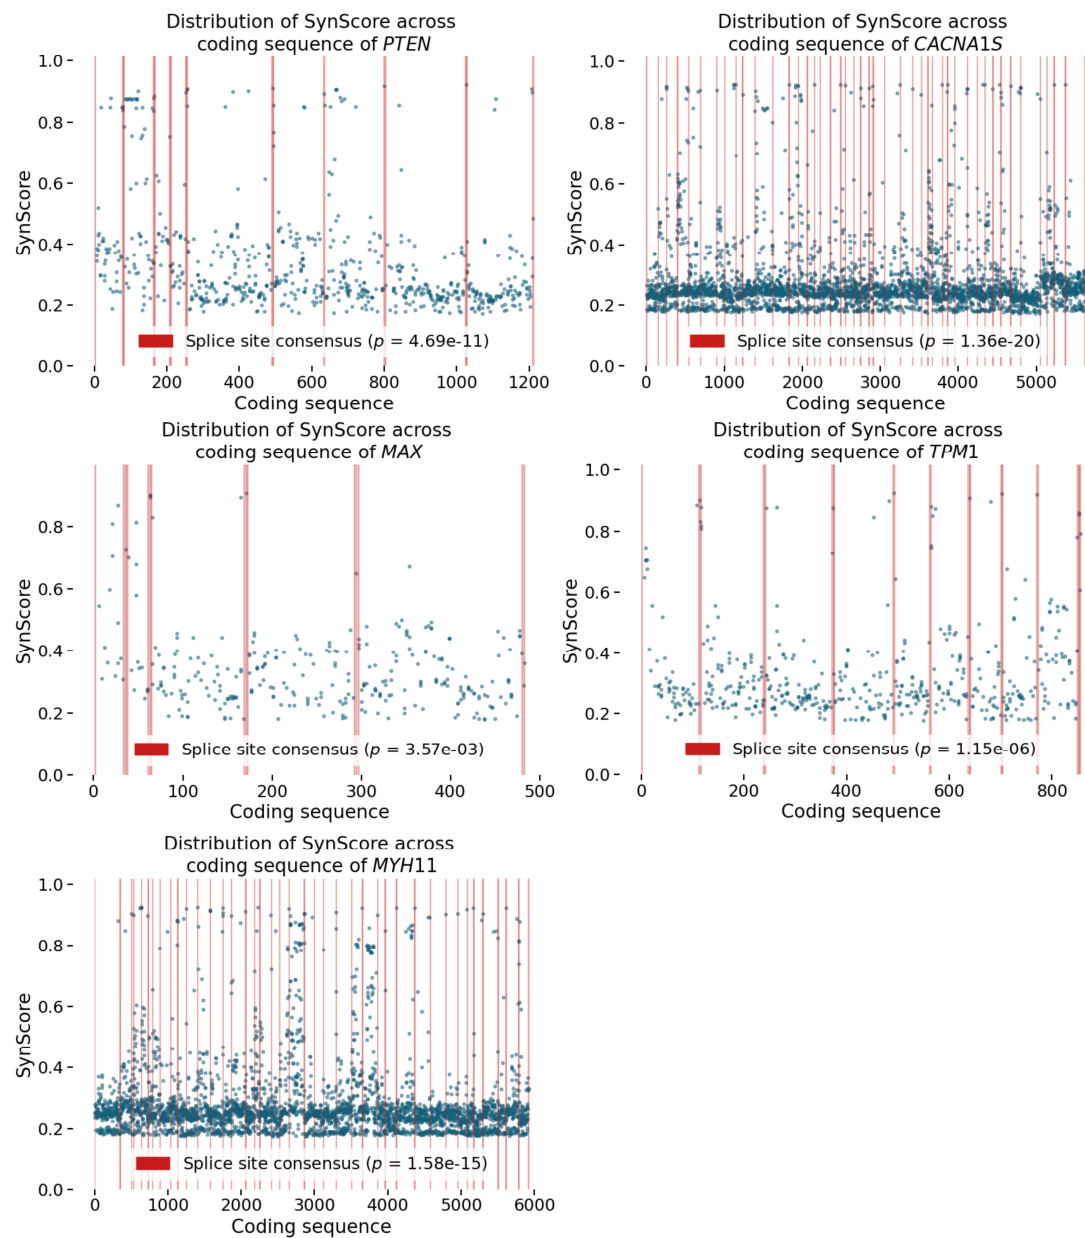

**Supplemental Figure S2.** Distribution of sSNVs in the coding sequence of actionable genes *PTEN*, *CACNA1S*, *MAX*, *TPM1*, and *MYH11*.
