# Supplementary material for: The SynMall resource for characterizing the functional impact of synonymous variation
Source: HighWire-hosted journal article supplement (doi:10.1101/gr.281257.125), 2025-12-17
Supplement: Supplemental_Fig_S4.pdf [file Supplemental_Fig_S4.pdf]

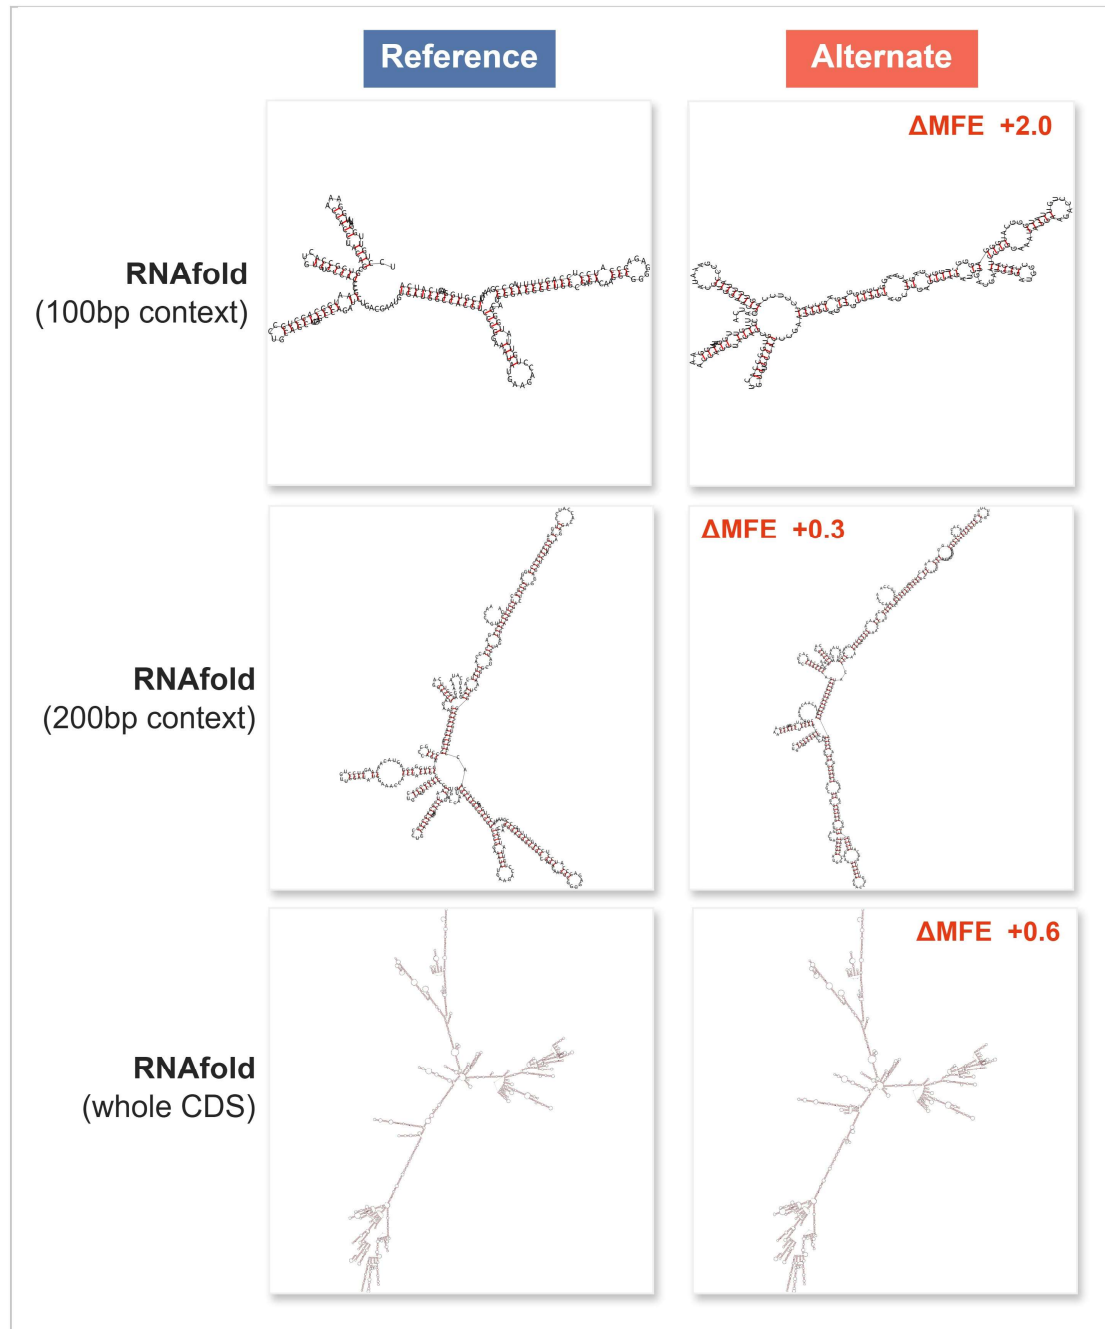

**Supplemental Figure S4.** mRNA secondary structures under different contexts. The mRNA secondary structure of the synonymous mutation (*ACE* c.2350G>A) was analyzed using context sequences of 100 bp, 200 bp, and the full-length transcript coding sequence.  $\Delta$ MFE represents the difference between the minimum free energy (MFE) of the alternate secondary structure and that of the reference secondary structure.
