# Supplementary material for: The SynMall resource for characterizing the functional impact of synonymous variation
Source: HighWire-hosted journal article supplement (doi:10.1101/gr.281257.125), 2025-12-17
Supplement: Supplemental_Fig_S5.pdf [file Supplemental_Fig_S5.pdf]

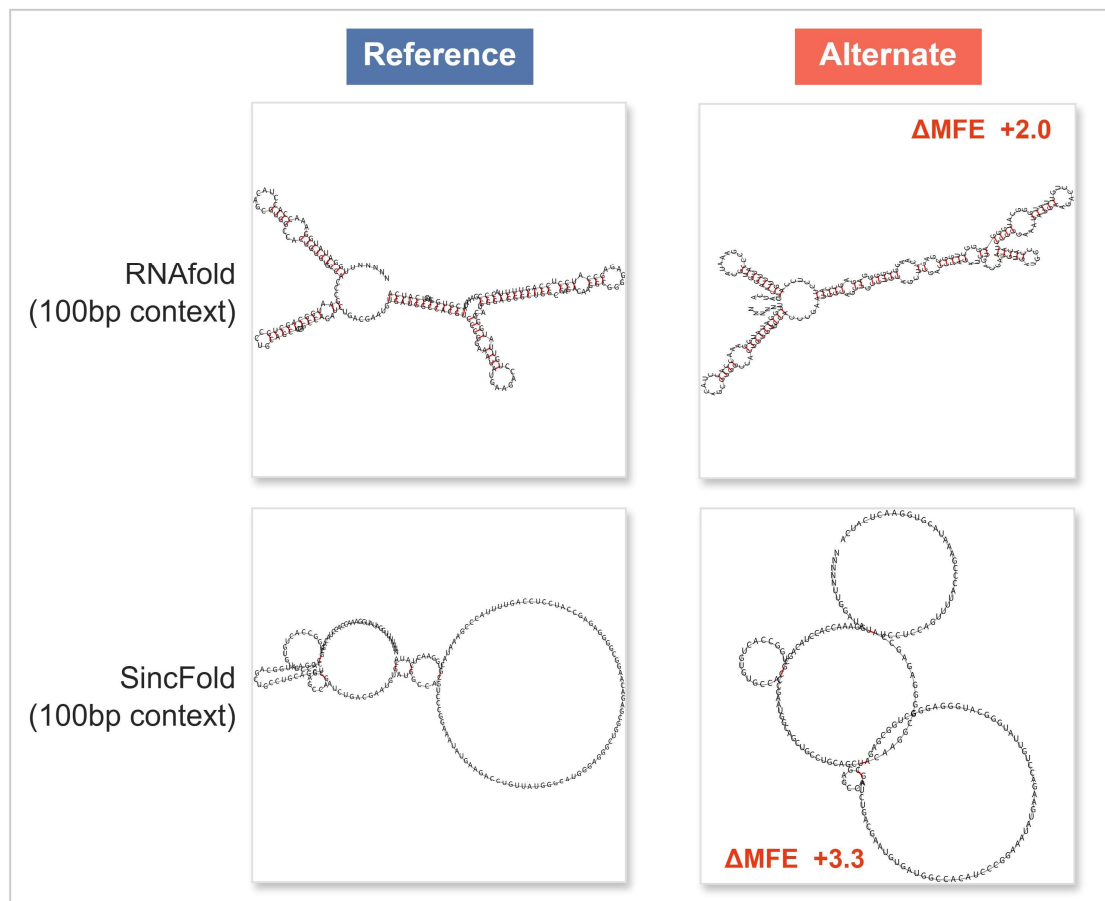

**Supplemental Figure S5.** mRNA secondary structures under ENST00000582761. The mRNA secondary structure of the synonymous mutation (*ACE* c.2350G>A) under transcript ENST00000582761 was analyzed using the context sequence of 100 bp.  $\Delta\text{MFE}$  represents the difference between the minimum free energy (MFE) of the alternate secondary structure and that of the reference secondary structure.
