# Supplementary material for: The SynMall resource for characterizing the functional impact of synonymous variation
Source: HighWire-hosted journal article supplement (doi:10.1101/gr.281257.125), 2025-12-17
Supplement: Supplemental_Fig_S6.pdf [file Supplemental_Fig_S6.pdf]

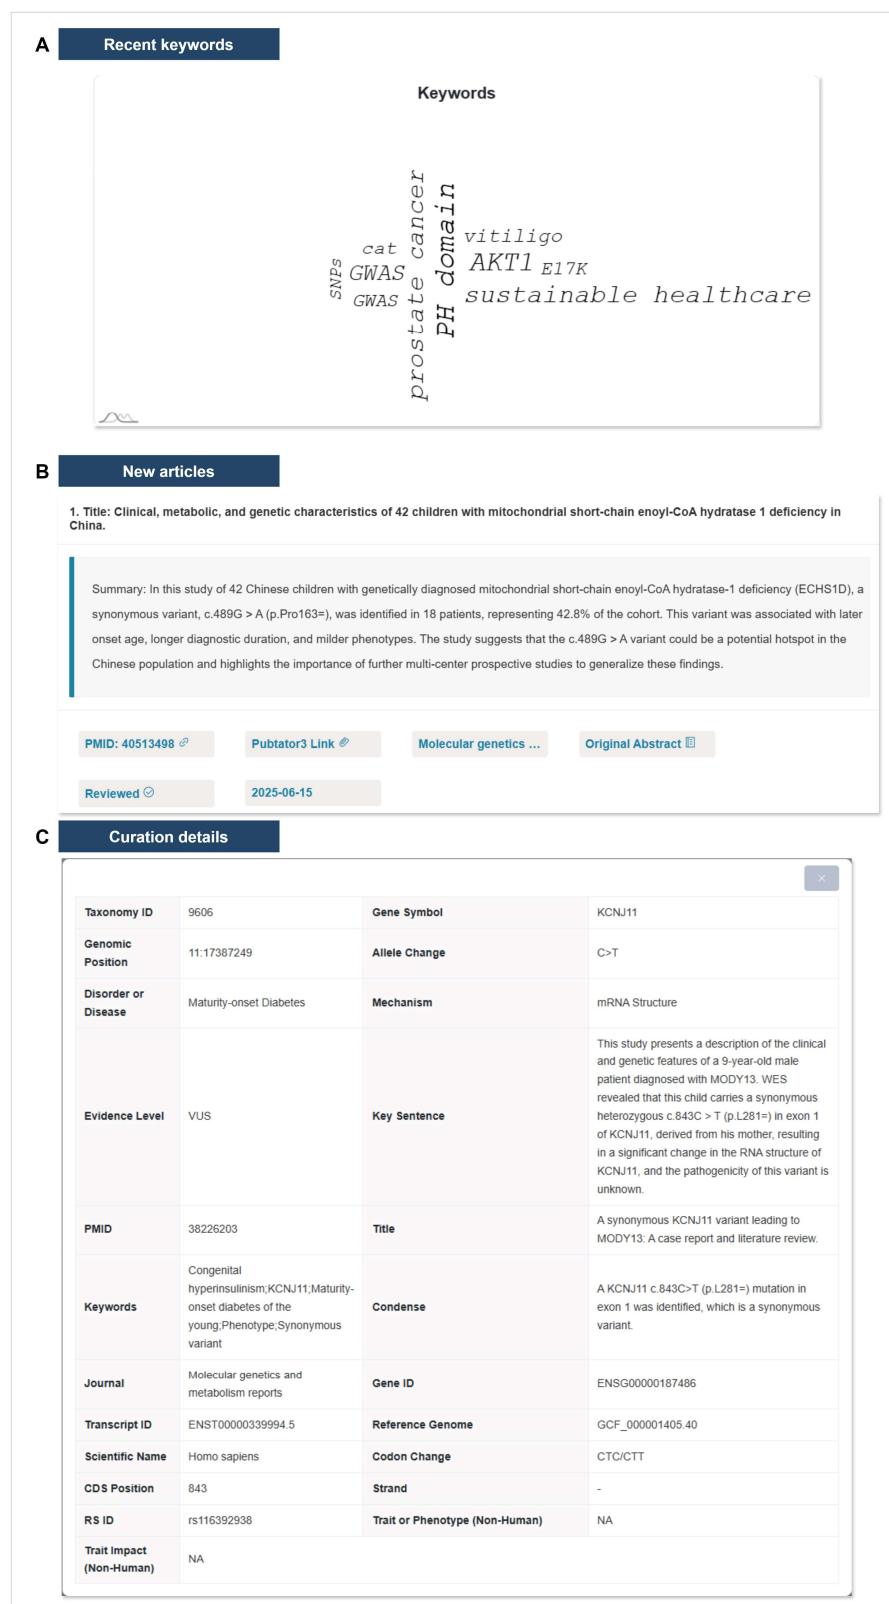

**Supplemental Figure S6.** News and curation page. (A) A keyword trend is displayed annually and monthly, based on appearance frequency. (B) Every day, research on synonymous mutations is filtered and summarized. (C) Detailed information on every pathogenic or functional record is curated from the literature.
