# Supplementary material for: The SynMall resource for characterizing the functional impact of synonymous variation
Source: HighWire-hosted journal article supplement (doi:10.1101/gr.281257.125), 2025-12-17
Supplement: Supplemental_Fig_S10.pdf [file Supplemental_Fig_S10.pdf]

Annotation header

In Silico Prediction

☐ Generic Deleteriousness Scores
☐ sSNV Deleteriousness Scores
☐ Regulatory/Functional Scores

External Database Annotation

☐ ClinVar
☐ COSMIC v100
☐ DisGeNet

☐ VariSNP
☐ GWAS Catalog
☐ GRASP v2

☐ dbDSM v2
☐ ClinGen
☐ PharmGKB

☐ Geuvadis
☐ GTEx
☐ DICE eQTL

Allele Frequency

☐ gnomAD v4
☐ ExAC
☐ ESP6500

☐ UK10K
☐ 1000GP
☐ TOPMed BRAVO

☐ CG46
☐ CG69
☐ GME

☐ AbraOM
☐ Kaviar
☐ HRC

☐ NCI-60
☐ Primate

Epigenetics

☐ Enhancer/Promoter
☐ Transcript Factor
☐ ChromHMM

☐ ENCODE
☐ ORegAnno
☐ m6A Sites

De Novo Variant

User settings

Upload Your File

Click to Upload

Example VCF File

Only one file is allowed to be uploaded. You can click the Example VCF File to download a test file.

Input Genome Version

☐ hg19
☒ hg38

Email

Please enter email

Retrieve

Reset

Demo Output

Success

The task has entered the processing queue, you can now leave the page. Your task ID is: 00606621-54f5-47fb-aa8c-c42139117f9c. When the task is completed, we will use an email to remind you.

Check the status of your submitted jobs on SynMall using the interface below:

Query Status:

00606621-54f5-47fb-aa8c-c42139117f9c

Check

Job is Completed!

**Supplemental Figure S10.** Batch self-service annotation. The annotation page in SynMall. (A) The annotation panel features a customizable header section. (B) Users simply need to upload a VCF file, specify the reference genome. Users can leave an email to receive notifications upon task completion. Alternatively, they can retrieve and obtain tasks on the homepage using a task ID without providing an email address.
