# Supplementary material for: The SynMall resource for characterizing the functional impact of synonymous variation
Source: HighWire-hosted journal article supplement (doi:10.1101/gr.281257.125), 2025-12-17
Supplement: Supplemental_Fig_S11.pdf [file Supplemental_Fig_S11.pdf]

### A Vertebrate species

Species Information

|                            |                       |
|----------------------------|-----------------------|
| Taxon                      | GenBank ID            |
| oryctolagus cuniculus      | GCA_000003625.1       |
| Data Source                | Total Amount          |
| European Variation Archive | 981                   |
| Mapped Amount              | Evolutionary Distance |
| 131                        | 0.3769                |

Total 2220 10/page < > Go to 1

Filter evidence status ☐
Filter mapped to hg38 ☐

Result

| RS ID       | Chr | Position | Ref | Alt | Evidence Status | Map(hg38) |
|-------------|-----|----------|-----|-----|-----------------|-----------|
| rs300016174 | 1   | 649376   | C   | T   | NA              | NA        |
| rs300018073 | 1   | 3038710  | C   | T   | NA              | NA        |
| rs300018073 | 1   | 3038710  | C   | T   | NA              | NA        |
| rs300018073 | 1   | 3038710  | C   | T   | NA              | NA        |
| rs300018073 | 1   | 3038710  | C   | T   | NA              | NA        |
| rs300018073 | 1   | 3038710  | C   | T   | NA              | NA        |
| rs300018073 | 1   | 3038710  | C   | T   | NA              | NA        |
| rs300018073 | 1   | 3038710  | C   | T   | NA              | NA        |

### B Economic species

Total 4490 10/page < > Go to 1

Trait

P-value <

Search

Result

| Variant        | Chr | Position | Ref | Alt | Trait                                    | P-Value    | Gene ID      | Source     | So |
|----------------|-----|----------|-----|-----|------------------------------------------|------------|--------------|------------|----|
| 6_28019382_C/G | 6   | 28019382 | C   | G   | stem thickness                           | 9.02e-8    | Os06g0675200 | GWAS Atlas | os |
| 6_28356308_C/T | 6   | 28356308 | C   | T   | total lesion length                      | 0.00000184 | Os06g0680700 | GWAS Atlas | os |
| 6_28100960_A/G | 6   | 28100960 | A   | G   | rice bacterial blight disease resistance | 0.00000215 | Os06g0676700 | GWAS Atlas | os |
| 6_28019382_C/G | 6   | 28019382 | C   | G   | breaking strength of the basal internode | 0.0000208  | Os06g0675200 | GWAS Atlas | os |
| 6_28019382_C/G | 6   | 28019382 | C   | G   | stem diameter                            | 0.000114   | Os06g0675200 | GWAS Atlas | os |
| 6_28019382_C/G | 6   | 28019382 | C   | G   | stem diameter                            | 0.000253   | Os06g0675200 | GWAS Atlas | os |
| 6_28019382_C/G | 6   | 28019382 | C   | G   | stem diameter                            | 0.000279   | Os06g0675200 | GWAS Atlas | os |
| 6_28019382_C/G | 6   | 28019382 | C   | G   | stem diameter                            | 0.000285   | Os06g0675200 | GWAS Atlas | os |
| 6_27969431_C/G | 6   | 27969431 | C   | G   | percentage of head rice recovery         | 0.000822   | Os06g0674000 | GWAS Atlas | os |

### C Primate species

Gorilla ✓

Pan troglo... ✓

Pongo abelii

Pongo py...

Bonobo

Total 57775 10/page < > Go to 1

Allele Frequency >

Search

Result

| Variant (Mapped to hg38) | Gorilla | Pan troglodytes | Pongo abelii | Pongo pygmaeus |
|--------------------------|---------|-----------------|--------------|----------------|
| 10_100048761_C/T         | 1       | 1               | 1            | 1              |
| 10_100065197_G/A         | 1       | 0.98            | 1            | 1              |
| 10_100081557_A/G         | 1       | 1               | 1            | 1              |
| 10_100185531_A/G         | 1       | 1               | 1            | 1              |
| 10_100329211_G/A         | 1       | 1               | 1            | 1              |
| 10_100354576_G/C         | 1       | 1               | NA           | NA             |
| 10_100487721_A/G         | 1       | 1               | 1            | 1              |
| 10_100488894_C/T         | 1       | 1               | 1            | 1              |
| 10_100506058_A/G         | 1       | 1               | NA           | NA             |
| 10_100509448_A/T         | 1       | 1               | 1            | 1              |

**Supplemental Figure S11.** Browse non-human species. (A) For vertebrate species, users can filter out records with "evidence status" and "hg38" (those mapped to the reference genome hg38 by MSA). (B) For economic species, filtering is available based on trait and p-value. (C) For primate species, users can refine results by allele frequency.
