# Supplementary material for: The SynMall resource for characterizing the functional impact of synonymous variation
Source: HighWire-hosted journal article supplement (doi:10.1101/gr.281257.125), 2025-12-17
Supplement: Supplemental_Table_S1.xlsx [file Supplemental_Table_S1.xlsx]

## Sheet: Table S1
Supplemental Table S1. Compare SynMall with other variant databases.
Databases	SynMall	CADD v.1.7	FAVOR
Resource
# Variant Effect Predictors	38 (CADD;DANN;Eigen;FATHMM-MKL;FATHMM-XF;CAPICE;TraP;PhD-SNPg;CPN-MSA;FitCons;EnDSM;frDSM;PrDSM;usDSM;Syntool;SliVA;SynVEP;MACIE;GenoCanyon;FIRE;Aloft;SpliceAI;MMSplice;dbscSNV;TargetScan;mirSVR;CADD-Splice;CsCape;CsCape-somatic;FunSeq;DeltaSplice;siPhy;bStatistic;PhastCons;PhyloP;Gerp;Zoonomia;RegSeq;)	18 (TargetScan;mirSVR;dbscSNV;SIFT;PolyPhen;PhastCons;PhyloP;bStatistic;Gerp;Grantham;SpliceAI;MMSplice;ESM-1;Zoonomia;RegSeq;Aparent2;Roulette;CADD)	14 (CADD;LINSIGHT;FAHTMM-XF;FunSeq;Aloft;PolyPhen;PolyPhen2;Grantham;MutationTaster;MutationAssessor;SIFT;PhastCons;PhyloP;Gerp)
All possible sSNVs*	√	√	√
Non-human Data	√
Literature Mining Data	√
Usability
# Search Patterns	10 (Genomic Coordinate;Ensembl Transcript ID;Ensemble Gene ID;Gene Name;Genomic Region;Keyword;RS ID; HGVSg; HGVSc; RefSeq Transcript ID)	2 (Genomic Coordinate;Genomic Region)	4 (Gene Name;RS ID;Genomic Region;Variant)
Customized Annotation	√
Result Visualization	√		√
Functionalitiy
Mechanism Analysis	√
Feature Extraction	√
Prioritization Strategy	√
Note: The bolded items in the Variant Effect Predictors list are synonymous mutation-specific tools. (1) Resource a) # Variant Effect Predictors (VEP): Number of VEP tools. SynMall integrates 38 VEP tools (including 7 exclusive to synonymous mutations), exceeding CADD v1.7 and FAVOR. b) All possible human sSNVs: Whether all human sSNVs are provided (a check mark indicates yes). SynMall, CADD v1.7…
