# Supplementary material for: The SynMall resource for characterizing the functional impact of synonymous variation
Source: HighWire-hosted journal article supplement (doi:10.1101/gr.281257.125), 2025-12-17
Supplement: Supplemental_Table_S3.xlsx [file Supplemental_Table_S3.xlsx]

## Sheet: Table S3
Supplemental Table S3. Response time evaluation for Batch Query (unit: ms)
Records	Genomic Coordinate	Gene Name	dbSNP ID
100	89	61.9	61.4
300	396.8	77.9	155.3
500	4045.4	86.8	1997.2
1000	7346.3	996.3	2988.5
Note: The number of threads was set to 10, and the experiments were conducted using Apache JMeter.
