# Supplementary material for: The SynMall resource for characterizing the functional impact of synonymous variation
Source: HighWire-hosted journal article supplement (doi:10.1101/gr.281257.125), 2025-12-17
Supplement: Supplemental_Table_S5.xlsx [file Supplemental_Table_S5.xlsx]

## Sheet: Table S5
Supplemental Table S5. Splice regulatory motifs information.
Exonic splicing regulatory motifs (ESR) collection
Index	Dataset	Exonic splicing silencer (ESS)	Exonic splicing enhancer (ESE)
1	RegRNA2	23	53
2	SpliceAID	74	60
3	RESCUE-ESE		238
4	Composite-ESR	217	400
5	FAS-HEX3	309
6	NI-ESR	496	979
7	Ast-ESR	285
8	Overall	701	1048
Statistics of synonymous mutations on splice site consensus and ESRs.
Index	Event	Variant count	Coverage
1	Locate in splice site consensus donor	1348407	0.0146245
2	Locate in splice site consensus acceptor	241632	0.00262068
3	Cause ESS change	35610462	0.386222
4	Cause ESE change	55152737	0.598173
5	Cause ESR change	26645390	0.288989
Note: The ESS or ESE category was not marked for Ast-ESR, since these hexamers appeared in the intersection of both significantly overrepresented and conserved groups.
